# Supplementary material
Source: PubMed Central journal article supplement (PMC7166458)
Supplement: JANE-83-415-s002.pdf [file JANE-83-415-s002.pdf]

|                |                  | mAb102.4 CEs (log <sub>10</sub> pg/mL) by sampling date |        |            |            |            |            |            |            |            |            |            |            |            |
|----------------|------------------|---------------------------------------------------------|--------|------------|------------|------------|------------|------------|------------|------------|------------|------------|------------|------------|
| BatID          | Pregnancy status |                                                         |        | Days since |            |            |            |            |            |            |            |            |            |            |
|                | Mar-10           | Mar-11                                                  | Jan-12 | last bleed | 101        | 84         | 37         | 76         | 54         | 71         | 43         | 119        | 131        | 188        |
| Females        | Mar-10           | Mar-11                                                  | Jan-12 | 28/07/2009 | 06/11/2009 | 29/01/2010 | 07/03/2010 | 22/05/2010 | 15/07/2010 | 24/09/2010 | 06/11/2010 | 05/03/2011 | 14/07/2011 | 18/01/2012 |
| A102           | P                | P                                                       | P      | 3.7        | 3.7        | 3.8        |            | 3.5        | 3.2        | 3.3        | 3.4        | 3.6        | 3.2        | 3.7        |
| A106           | KP               | N                                                       | N      | 3.5        | 3.6        | 4.0        |            | <2         | <2         | <2         | <2         | 4.0        | 3.2        | 3.5        |
| A111           | KP               | P                                                       | N      | <2         | <2         | <2         |            | <2         | <2         | <2         | <2         | <2         | <2         | <2         |
| A120           | KP               | P                                                       | P      | 2.5        |            | 3.1        |            | 2.9        | 2.5        | 2.5        | 2.2        | 3.0        | 2.3        | 2.9        |
| A125/A096/A095 | N                | NA                                                      | NA     | 4.0        |            | 3.6        |            | 3.6        | 3.8        |            |            |            |            |            |
| A132           | KP               | P                                                       | N      | 3.9        |            | 4.2        |            | 4.0        | 3.6        | 3.5        | 3.6        | 4.1        |            | 3.6        |
| A141           | A                | P                                                       | N      | 3.4        |            | 3.7        |            | 3.5        | 3.0        | 3.4        | 3.4        | 3.4        | 3.3        | 3.0        |
| A142           | A                | P                                                       | ND     | 4.0        |            | 3.4        |            | 3.4        | 3.3        | 3.3        | 3.3        | 4.1        |            |            |
| A143           | A                | N                                                       | N      | 4.2        |            | 4.3        |            | 4.0        | 3.9        | 3.7        | 3.9        | 4.0        | 4.1        | 4.3        |
| A145           | KP               | NA                                                      | NA     | <2         |            |            |            | 2.3        |            |            |            |            |            |            |
| A146           | P                | P                                                       | ND     | 2.2        |            | 2.6        |            |            | 2.2        | <2         | <2         | 2.5        | <2         |            |
| A147           | KP               | P                                                       | P      | 3.1        |            | 3.6        |            | 3.5        | 3.3        | 3.3        | 3.4        | 3.7        | 3.2        | 3.7        |
| A149           | A                | P                                                       | ND     | <2         |            | <2         |            | <2         | <2         | <2         | <2         | <2         | <2         |            |
| A150           | KP               | P                                                       | P      | 3.0        |            | 3.2        |            | 2.9        | 2.6        | <2         | 2.2        | 2.8        |            | 3.2        |
| A151           | A                | KP                                                      | P      | 3.1        |            | 2.4        |            | 2.7        | 2.2        | 2.4        | 3.0        | 3.1        | 3.1        | 2.8        |
| A153           | KP               | P                                                       | P      | 2.7        |            | 2.8        |            | <2         | <2         | <2         | 3.0        | 3.1        | <2         | 4.1        |
| A154/A188      | KP               | P                                                       | N      | <2         |            | <2         |            | <2         | <2         | <2         | <2         | <2         | <2         | <2         |
| A155           | P                | N                                                       | P      | 3.6        |            | 3.7        |            | 3.9        | 3.1        | 2.8        | 3.0        | 3.6        | 3.2        | 3.5        |
| A156           | A                | NA                                                      | NA     | 4.3        |            | 4.0        |            | 3.9        | 3.8        | 3.8        |            |            |            |            |
| A157           | KP               | ND                                                      | P      | <2         |            | <2         |            | <2         | <2         | <2         | <2         | <2         | <2         | <2         |
| A158           | A                | P                                                       | ND     | 3.6        |            | 3.4        |            | 3.4        | 3.4        |            |            | 3.6        | 3.2        |            |
| A159           | N                | N                                                       | N      | <2         |            |            |            | <2         | <2         | <2         | <2         | <2         | <2         | <2         |
| A160           | A                | N                                                       | N      | 2.9        |            |            |            | 2.4        | <2         | <2         | 2.7        | 3.2        | 3.0        | 3.5        |
| A162           | A                | P                                                       | N      | <2         |            | <2         |            | <2         | <2         | <2         | <2         | <2         | <2         | 2.8        |
| A163           | A                | P                                                       | P      | 2.9        |            | 3.4        |            | 3.2        | 2.8        | 2.9        | 2.9        | 3.4        | 2.7        | 3.2        |
| A164           | A                | P                                                       | P      | 3.8        |            | 3.8        |            | 3.6        | 3.6        | 3.5        | 3.5        | 4.1        | 3.3        | 3.9        |
| A167           | A                | NA                                                      | NA     | <2         |            | <2         |            | <2         |            |            |            |            |            |            |
| A168/A094/A091 | N                | N                                                       | P      | 3.4        |            | 3.5        |            | 3.4        | 3.1        | 3.2        | 3.3        |            | 3.2        | 3.3        |
| Males          |                  |                                                         |        | 2.5        | 2.2        | 2.4        | 2.4        | 2.7        | 2.8        | 2.4        | 2.7        | 2.6        | 2.5        | 2.8        |
| A195           |                  |                                                         |        | 2.9        | 2.7        | 2.7        | 2.9        |            |            |            |            |            |            |            |
| A198           |                  |                                                         |        | 2.9        | 2.5        | 2.4        | 2.7        | 3.5        | 3.2        | 2.9        | 4.0        | 3.5        | 3.3        | 3.7        |
| A192           |                  |                                                         |        | 3.6        | 3.0        | 3.4        | 3.4        | 3.7        |            |            |            |            |            |            |
| A190           |                  |                                                         |        | 3.7        | 3.4        | 3.3        | 3.3        | 3.6        | 3.5        | 3.6        | 3.8        | 3.8        | 3.8        | 3.6        |
| A193           |                  |                                                         |        | 3.8        | 4.2        |            |            |            |            |            |            |            |            |            |
| A191           |                  |                                                         |        | <2         | <2         | <2         |            |            | 2.4        | 2.4        | 2.1        | <2         | <2         | <2         |
| A189           |                  |                                                         |        | <2         | <2         | <2         |            | <2         | <2         | <2         | <2         | <2         | <2         | <2         |
| A197           |                  |                                                         |        | 2.0        | <2         | <2         | <2         | <2         | 2.2        | <2         | <2         | <2         | <2         | <2         |
| A105           |                  |                                                         |        | 2.9        | 2.7        | 2.7        |            | 2.5        | 2.5        | 2.7        | 2.9        | 2.7        | 2.8        |            |
| A107/A090      |                  |                                                         |        | 3.5        | 3.2        | 3.3        |            | 3.4        | 3.5        | 3.4        | 3.4        | 3.3        | 3.3        | 3.3        |
| A110           |                  |                                                         |        | 3.8        | 3.3        | 3.4        |            | 3.4        | 3.4        | 3.5        | 3.6        | 3.5        | 3.6        |            |
| A092/A103      |                  |                                                         |        | <2         | <2         | <2         |            | <2         | <2         | <2         | <2         | <2         | <2         | <2         |
| A113           |                  |                                                         |        | 2.4        | 3.0        | 2.8        |            | 2.6        | 2.6        | 2.9        | 2.5        | 2.3        | 2.4        | 2.4        |
| A123           |                  |                                                         |        | 2.6        | 2.4        | 2.5        |            |            |            |            |            |            |            |            |
| A117           |                  |                                                         |        | 2.9        | 2.8        | 2.9        |            | 2.8        | 3.0        | 3.0        | 3.0        | 2.8        | 2.8        | 2.4        |
| A118           |                  |                                                         |        | 3.1        | 3.0        | 3.6        |            | 3.5        | 3.4        | 3.5        | 3.5        | 3.3        | 3.5        | 3.3        |
| A131           |                  |                                                         |        | 3.4        | 3.1        | 3.4        |            | 3.5        | 3.4        | 3.4        | 2.4        | 3.7        | 3.6        | 3.7        |
| A124           |                  |                                                         |        | 3.7        | 3.7        | 3.8        |            | 3.9        | 3.7        | 3.7        | 3.5        | 3.7        | 3.8        |            |
| A119           |                  |                                                         |        | 3.9        | 3.8        | 3.8        |            | 3.7        | 4.0        | 4.0        | 3.9        | 4.1        | 4.0        |            |
| A121           |                  |                                                         |        | <2         | <2         | <2         |            | <2         | <2         | <2         | <2         | <2         | <2         | <2         |
| A114           |                  |                                                         |        | <2         | <2         | <2         |            | <2         | <2         | <2         | <2         | <2         | <2         | <2         |
| A135           |                  |                                                         |        | <2         | <2         | <2         |            | <2         | <2         | <2         | <2         | <2         | <2         | <2         |
| A136           |                  |                                                         |        | <2         | <2         | <2         |            | <2         | <2         | <2         | 2.1        |            |            |            |
| A128           |                  |                                                         |        |            |            | 3.4        |            | 3.4        | 2.5        | 3.2        | 3.1        | 3.4        | 3.3        |            |

\* Multiple collar names are a single bat with multiple bats (tracked through PIT tag number)  
 Sample not taken  
P Pregnant  
KP Known pup  
N Non-pregnant  
A Aborted pregnancy
